# Supplementary material
Source: publisher figshare collection journal article supplement (https://frontiersin.figshare.com/ndownloader/files/35080516)
Supplement: Supplementary file [file 35080516]

## Supplementary Material

### Supplementary Figures

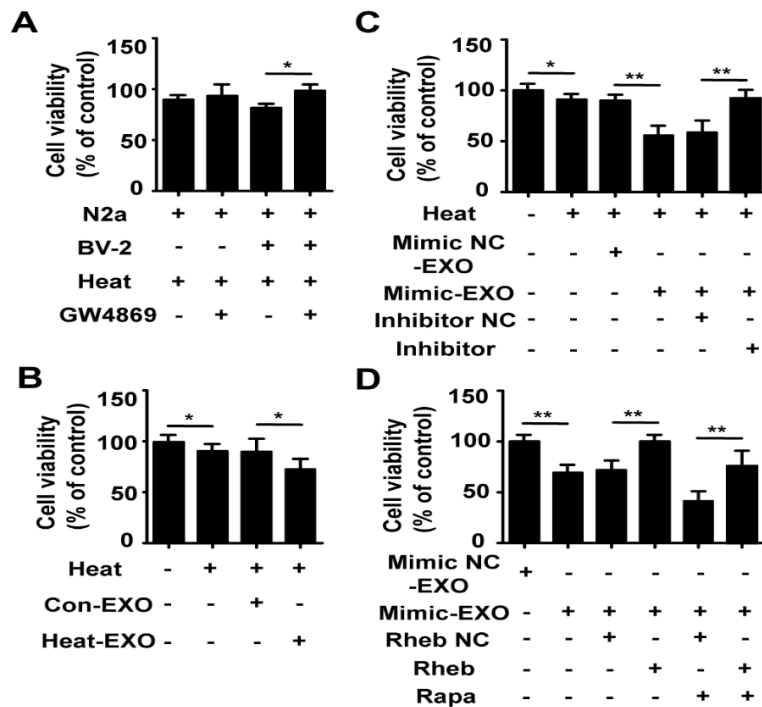

**Figure S1: Cell viability attached to Figure1 (A), Figure3(B), Figure5(C) and Figure7(D).** (A) N2a cells cultured alone or cocultured with BV-2 cells were pretreated with or without GW4869 (20  $\mu$ M) for 1 h and then subjected to heat stress at 42°C for 2 h, followed by a 6 h recovery period at 37°C. Viability of N2a cells was determined by CCK8. (B) N2a cells cultured alone or incubated with exosomes derived from sham or heat-stressed microglia for 24 h to allow enough exosomal uptake and then subjected to heat stress at 42°C for 2 h, followed by a 6 h recovery period at 37°C. Cell viability was determined by CCK8. (C) N2a cells were pretreated with or without miR-155 inhibitor or its negative control and then incubated with exosomes derived from BV-2 cells that were subjected to miR-155 mimic or miR-155 mimic negative control transfection. Finally, the cells were subjected to heat stress at 42°C for 2 h, followed by a 6 h recovery period at 37°C. Cell viability was determined by CCK8. (D) N2a cells were transfected with or without a recombinant lentivirus that overexpressed Rheb and then incubated with miR-155-upregulated microglial exosomes alone or together with 100 nM Rapa. Afterward, the cells were subjected to heat stress at 42°C for 2 h, followed by a 6 h recovery period at 37°C. Cell viability was determined by CCK8. All the data are presented as the means $\pm$ SDs of at least three independent experiments. \* $p$ <0.05; \*\* $p$ <0.01.

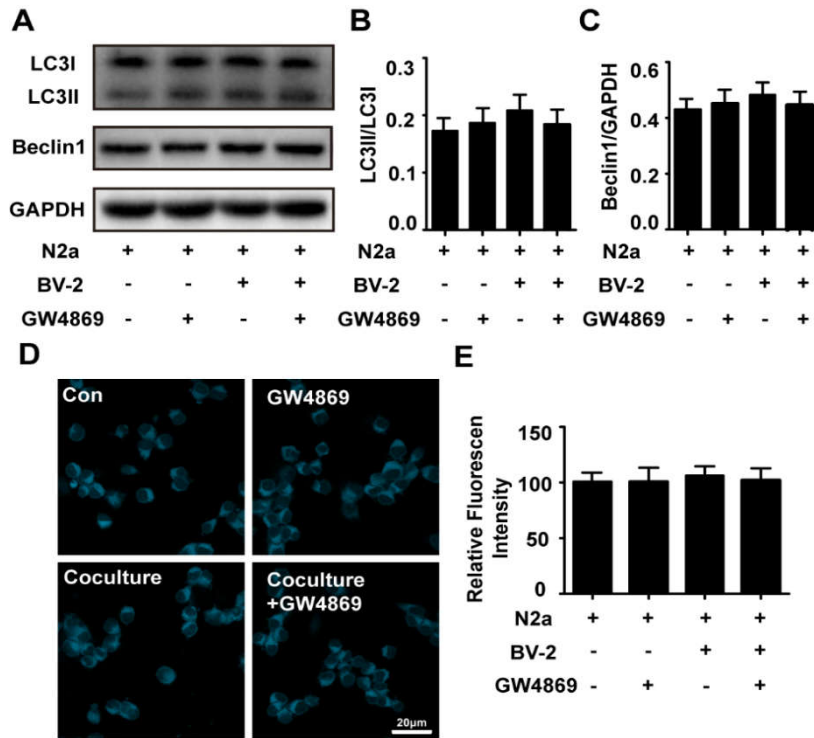

**Figure S2: Negative control of Figure1.** N2a cells cultured alone or cocultured with BV-2 cells and then treated with or without GW4869 (20  $\mu$ M, a commonly used inhibitor that can reduce exosomal secretion by decreasing nSMase2 activity) for 1 h. (A-C) The protein expression of LC3 and Beclin-1 in N2a cells was determined by Western blotting. Densitometric analysis was performed. (D-E) The autophagosomes in N2a cells were stained with MDC and subjected to confocal microscopy. Representative images and the analysis are shown. All the data are presented as the means $\pm$ SDs of at least three independent experiments.

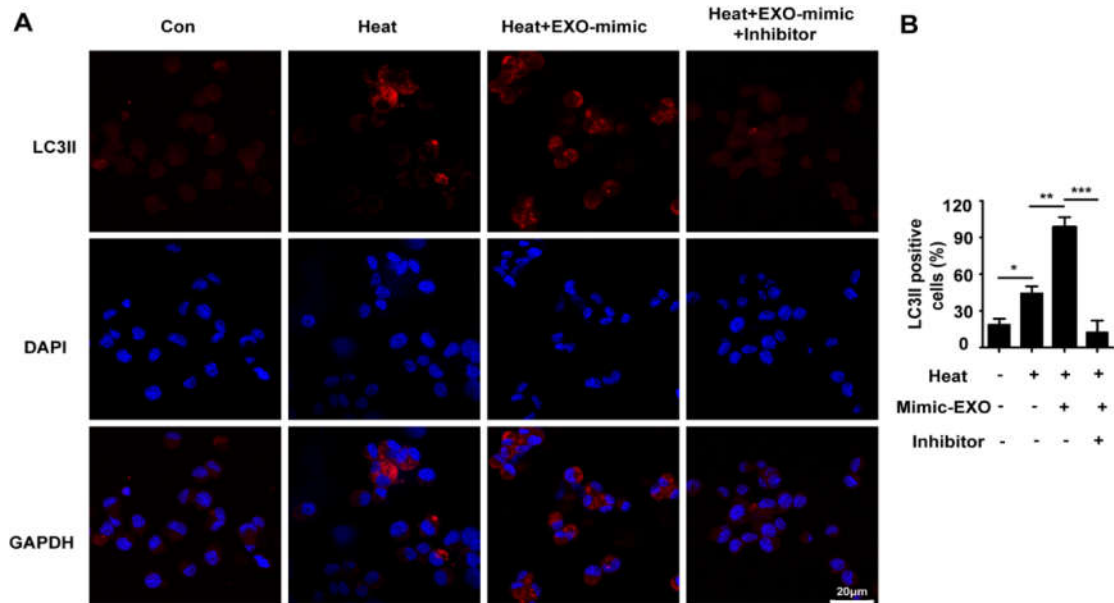

**Figure S3: miR-155 plays a critical role in the regulation of heat stress-induced neuronal autophagy by microglial exosomes** N2a cells were pretreated with or without miR-155 inhibitor or its negative control and then incubated with exosomes (50 $\mu$ g/ml) derived from BV-2 cells that were subjected to heat stress, miR-155 mimic or miR-155 mimic negative control transfection. Finally, the cells were subjected to heat stress at 42°C for 2 h, followed by a 6 h recovery period at 37°C. **(A-B)** The location of LC3II in the cytoplasm of N2a cells were examined via confocal microscopy. Representative images and the analysis are shown. All the data are presented as the means $\pm$ SDs of at least three independent experiments. \* $p$ <0.05, \*\* $p$ <0.01, \*\*\* $p$ <0.001.

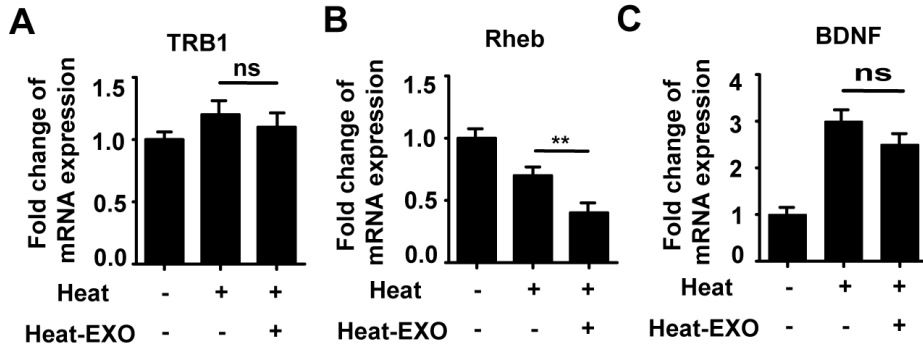

**Figure S4: Screening the target of miR-155 in neuron.** N2a cells cultured alone or incubated with exosomes derived from heat-stressed microglia for 24 h to allow enough exosomal uptake and then subjected to heat stress at 42°C for 2 h, followed by a 6 h recovery period at 37°C, the expression of TRB1 **(A)**, Rheb **(B)** and BDNF **(C)** in N2a cells was measured by qRT-PCR and normalized to HPRT expression. All the data are presented as the means $\pm$ SDs of at least three independent experiments. \*\* $p$ <0.01.

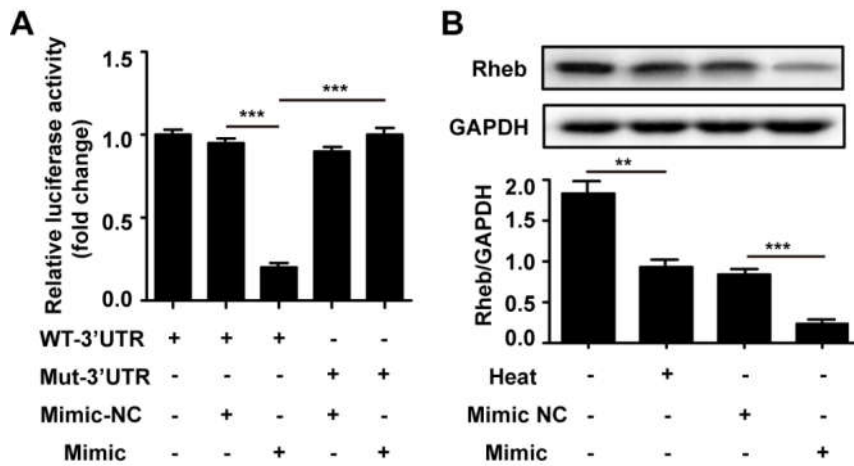

**Figure S5: Rheb is the target of miR-155.** **(A)** The luciferase reporter plasmids carrying the WT or Mut 3'UTR of Rheb were cotransfected with either the miR-155 mimic or miR-155 mimic-NC into 293T cells, after 24h, luciferase activity was detected. **(C)** N2a cells were transfected with miR-155 mimic or its negative control for 24h, and then subjected to heat exposure at 42°C for 2h, followed by a 6h recovery period at 37°C. The protein expression of Rheb in N2a cells was determined by Western blotting. Densitometric analysis was performed. All the data are presented as the means $\pm$ SDs of at least three independent experiments. \*\* $p$ <0.01, \*\*\* $p$ <0.001.

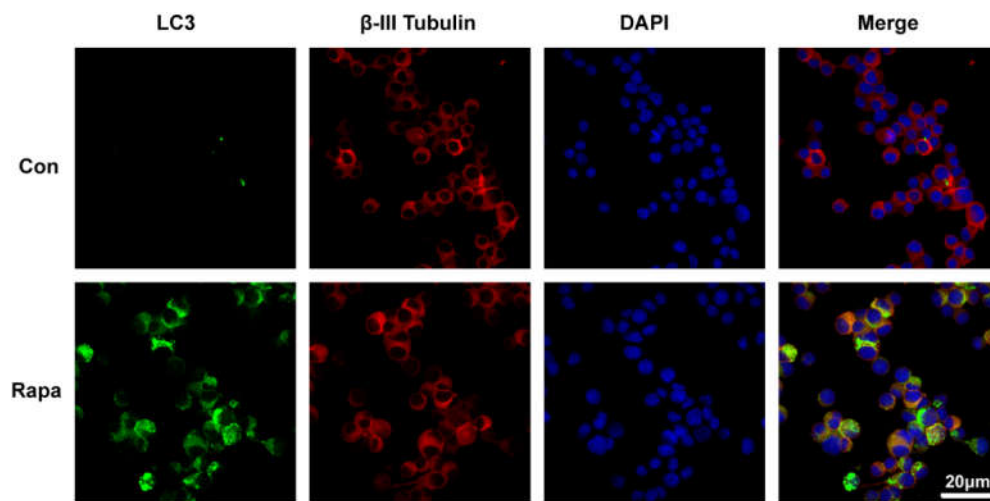

**Figure S6: The effects of Rapa on neuronal autophagy.** N2a cells were treated with or without 100 nM Rapa, the immunolocalization of LC3II and  $\beta$ -III Tubulin in the cytoplasm of N2a cells was examined via confocal microscopy.
